# Supplementary material
Source: Springer Nature journal article supplement (https://www.springermedizin.de/resource/supplementary/12985_2011_1568_MOESM3_ESM.pdf/9610108)

**A**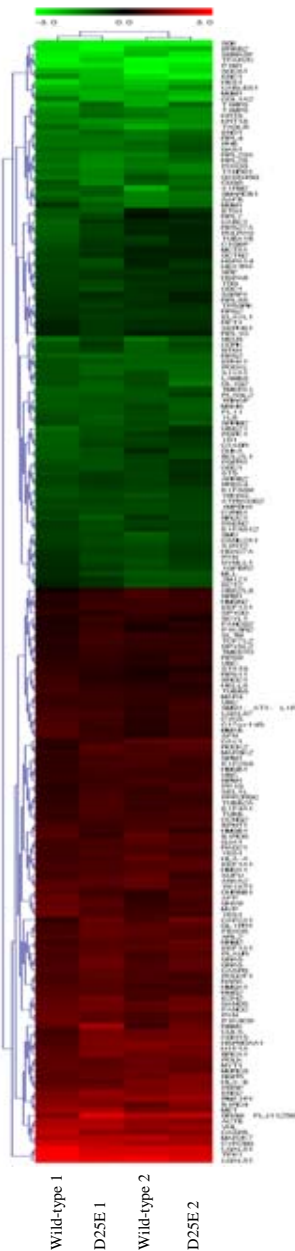**B**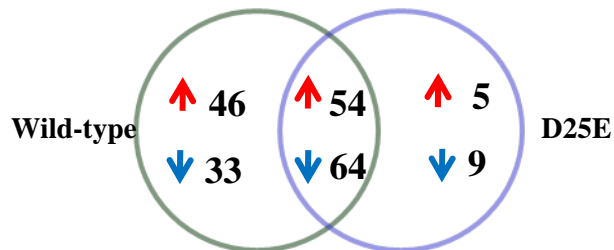**C**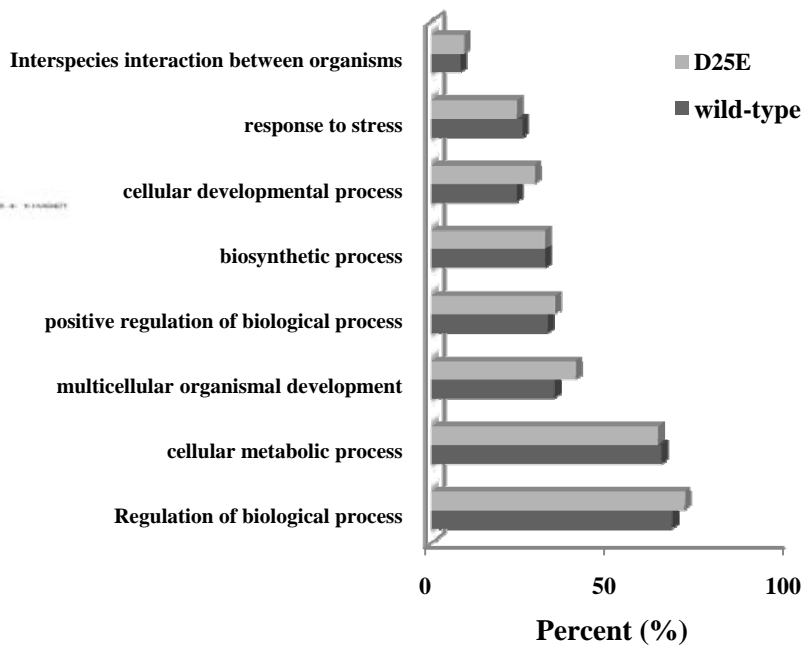

Supplement: MOESM3 [file 9610108]
